# Supplementary material for: The Vertebral Artery: A Systematic Review and a Meta-Analysis of the Current Literature
Source: MDPI journal article supplement (doi:10.3390/diagnostics13122036), 2023-06-12
Supplement: s1 [file s1]

Supplementary Material

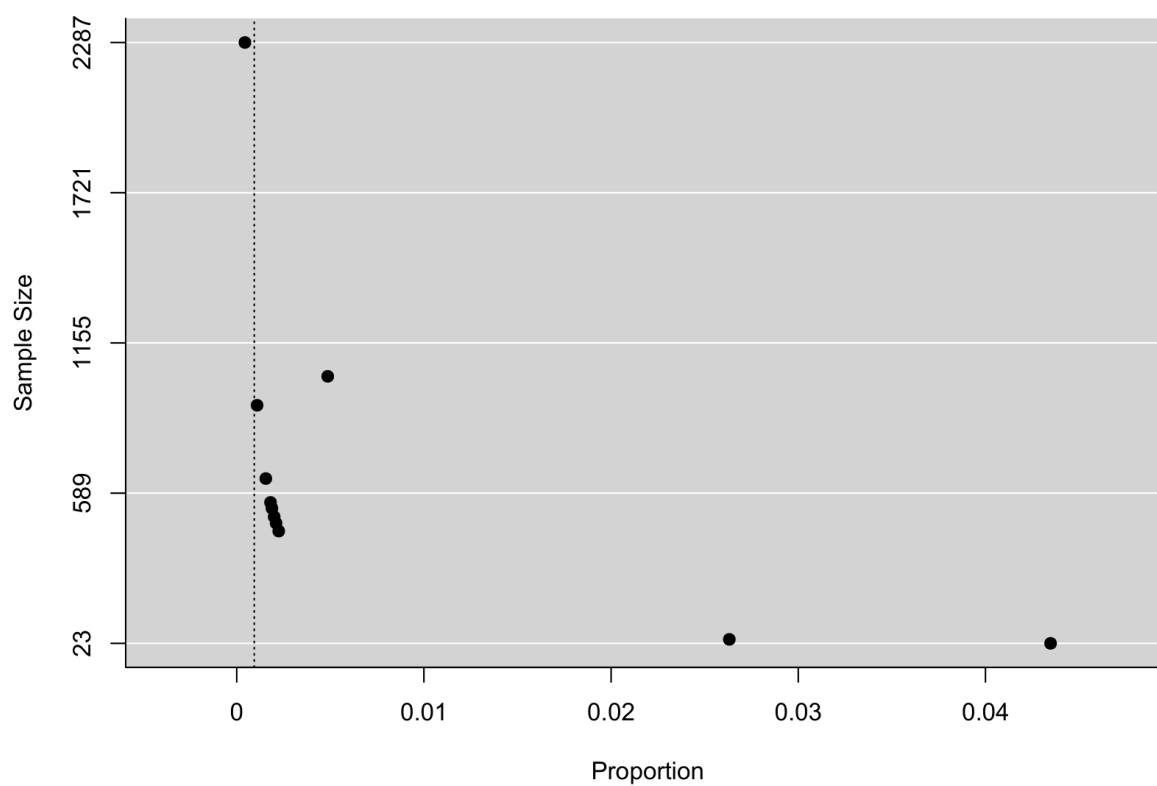

Figure S1. C3\_TF\_funnel sample size.

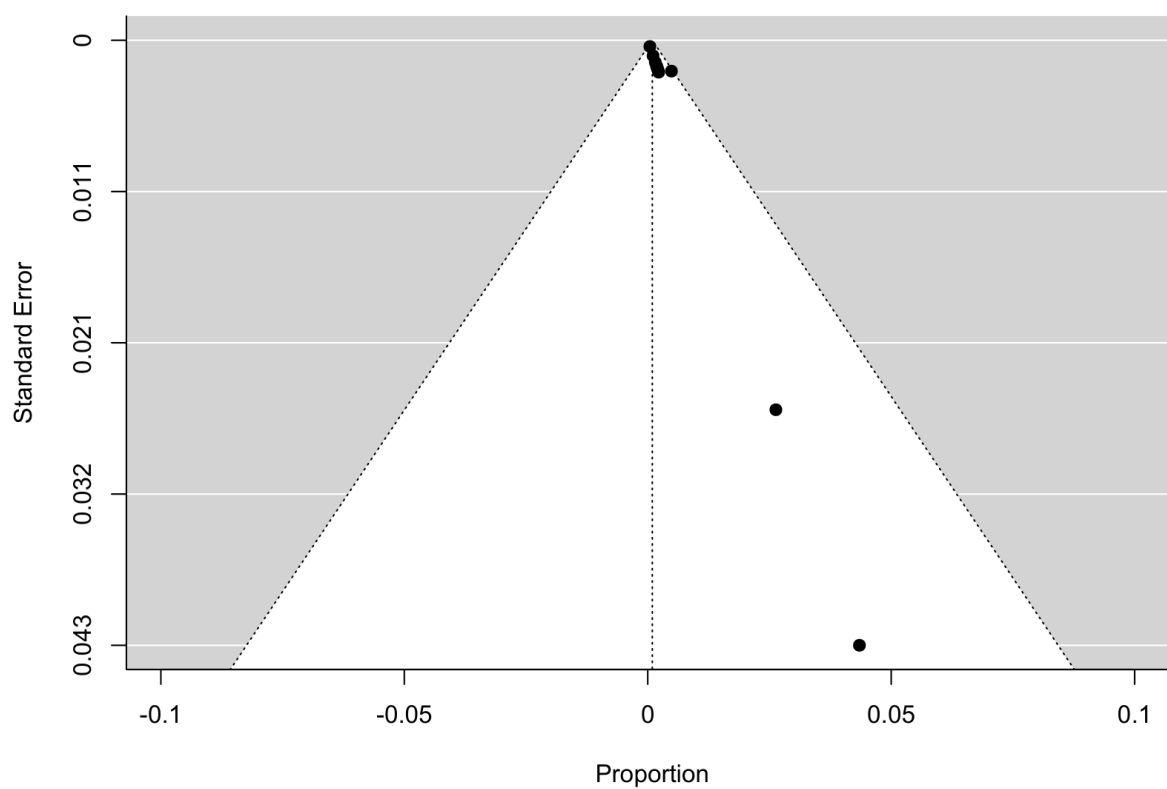

Figure S2. C3\_TF\_funnel SE.

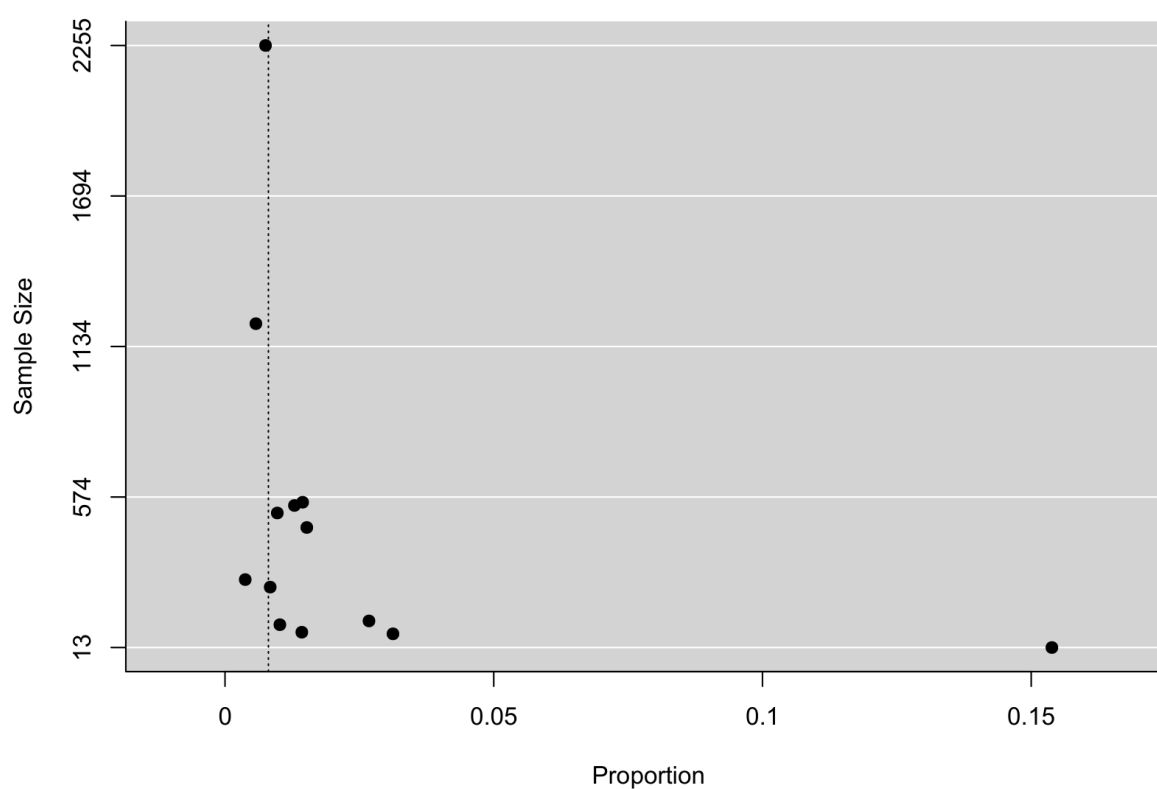

Figure S3. C4\_TF\_LEFT\_funnel sample size.

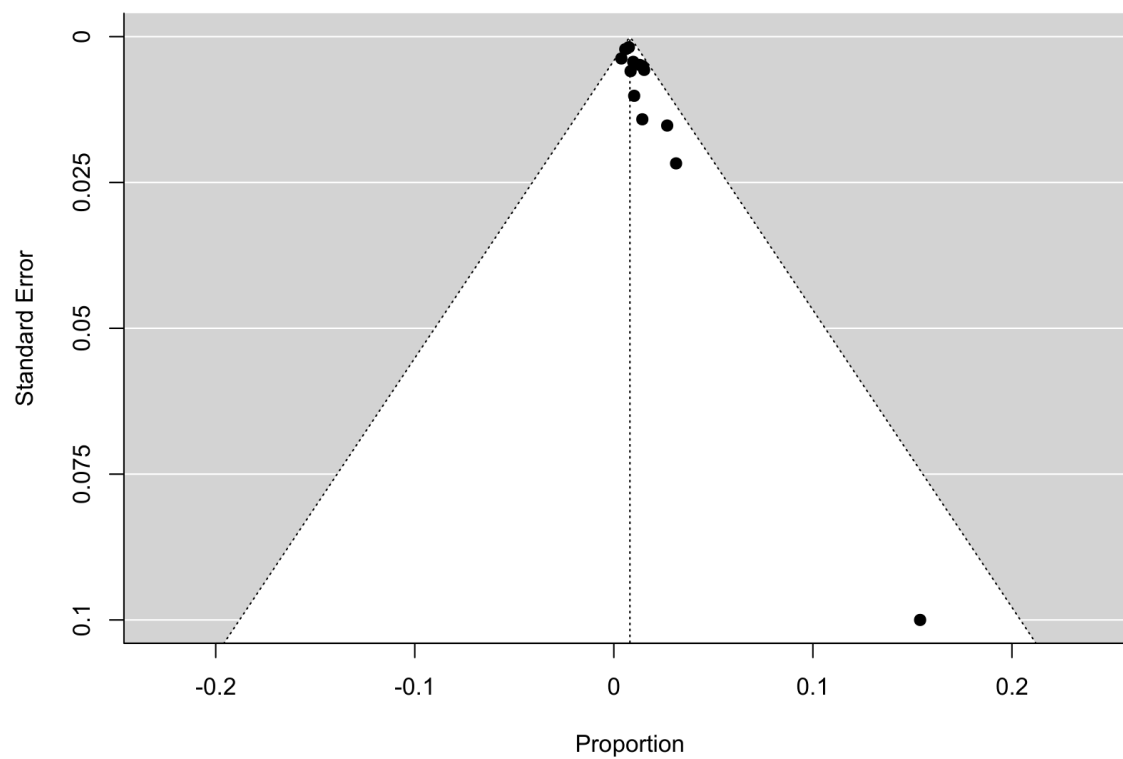

Figure S4. C4\_TF\_LEFT\_funnel SE.

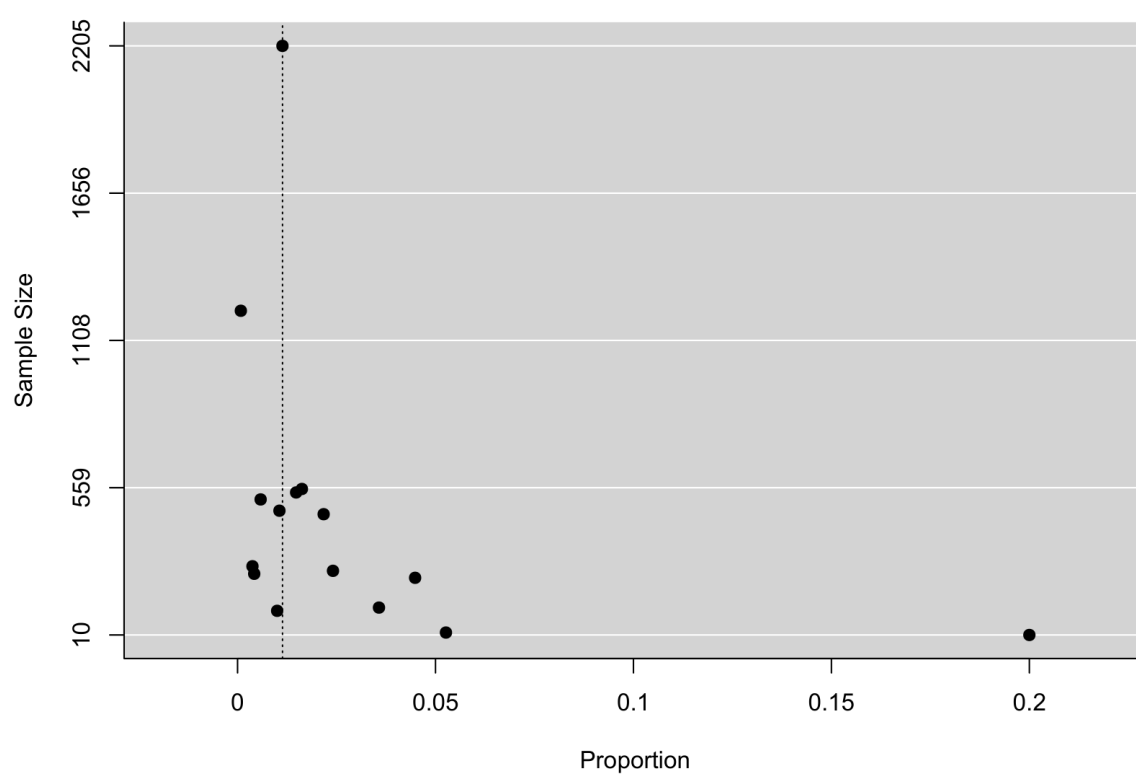

Figure S5. C4\_TF\_RIGHT\_funnel sample size.

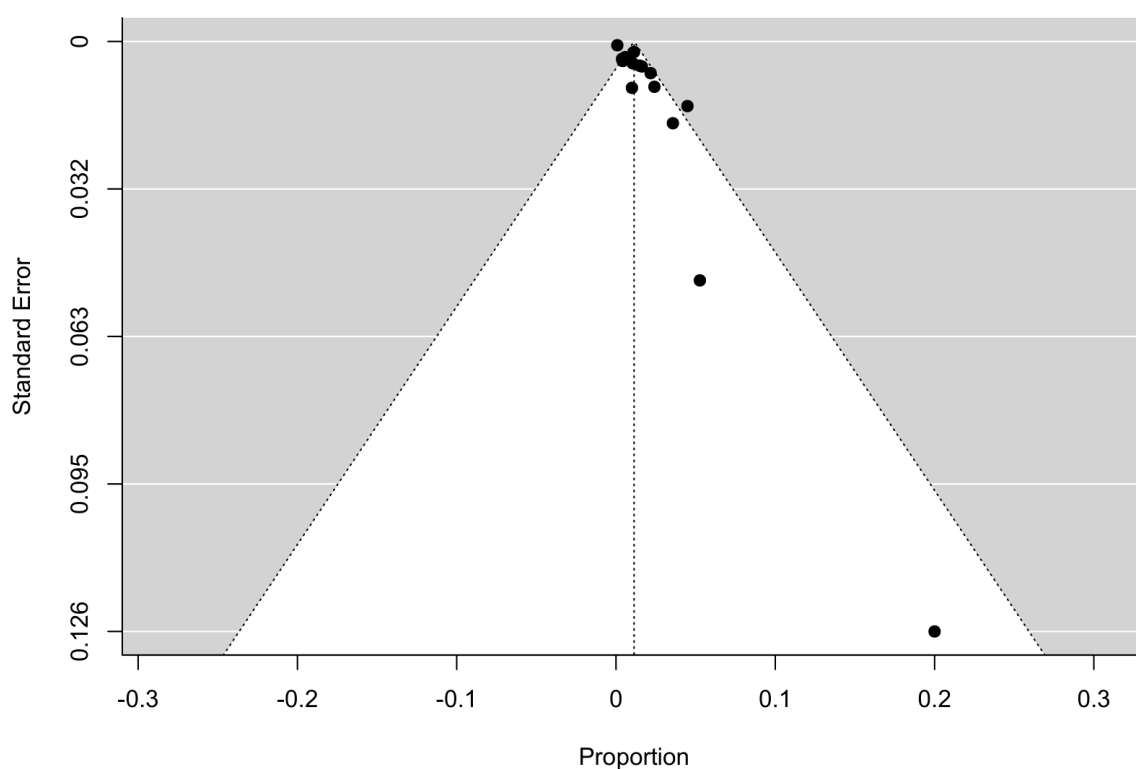

Figure S6. C4\_TF\_RIGHT\_funnel SE.

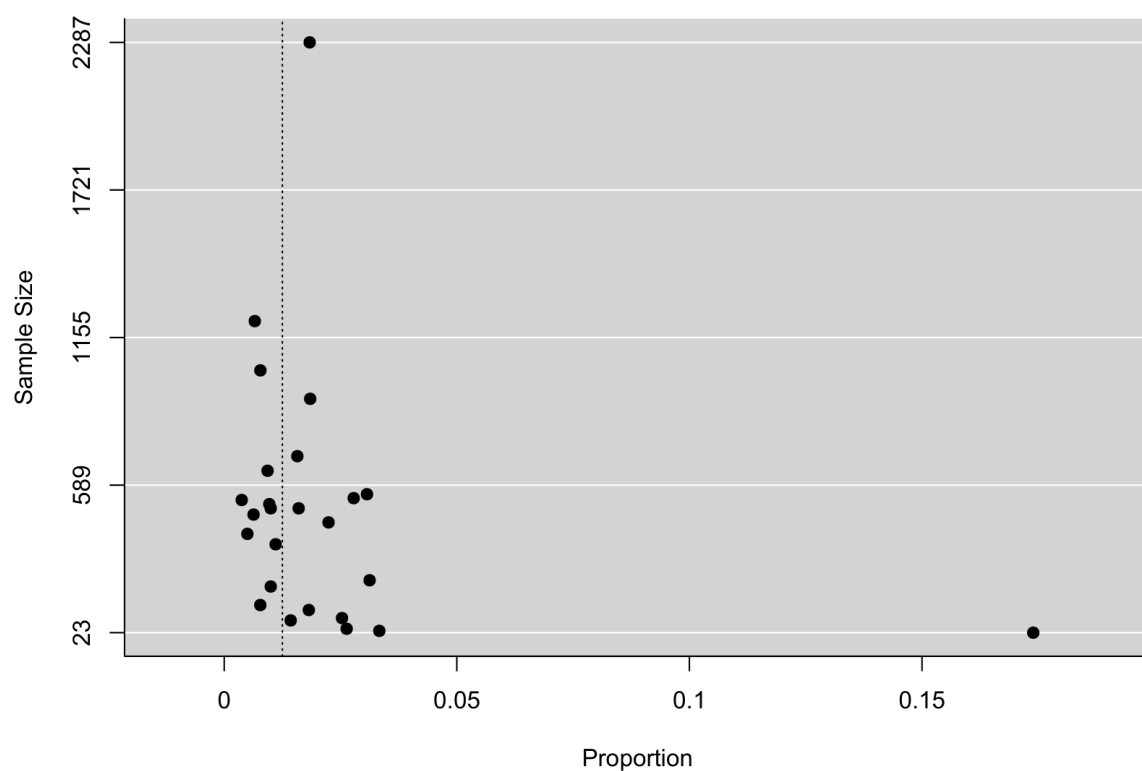

Figure S7. C4\_TF\_funnel sample size.

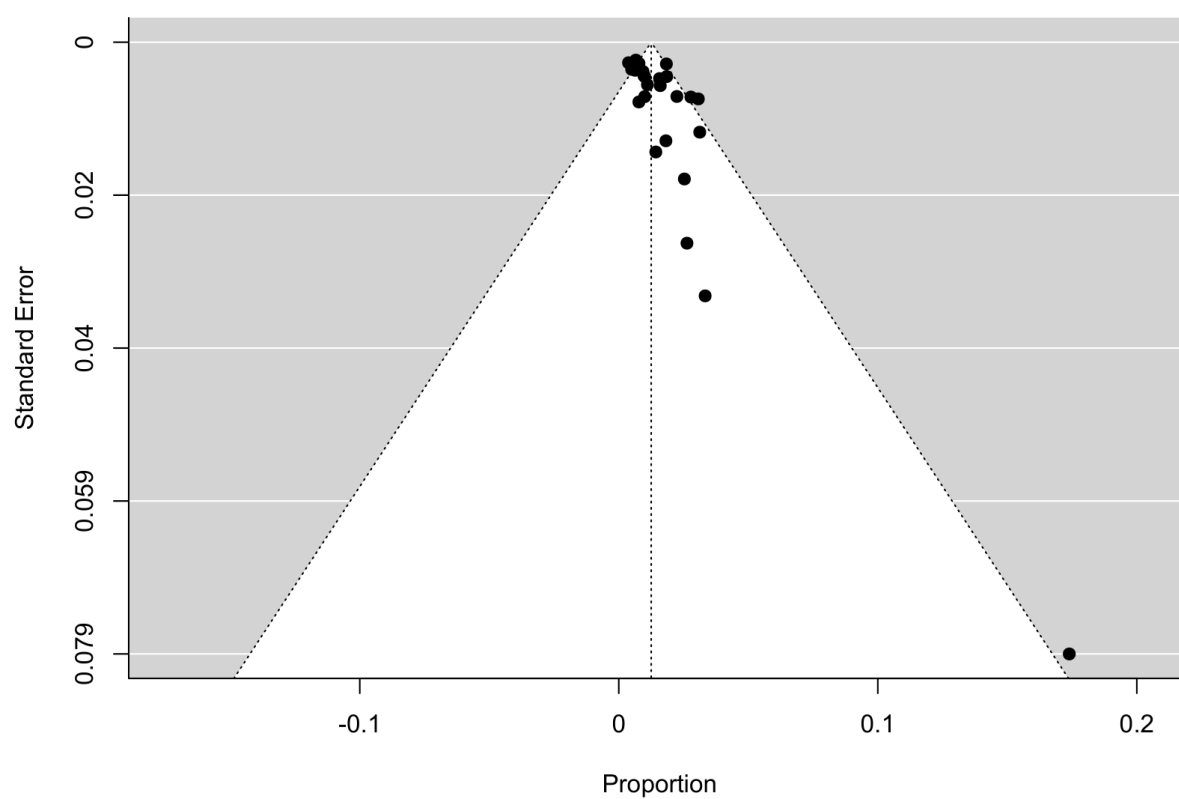

Figure S8. C4\_TF\_funnel SE.

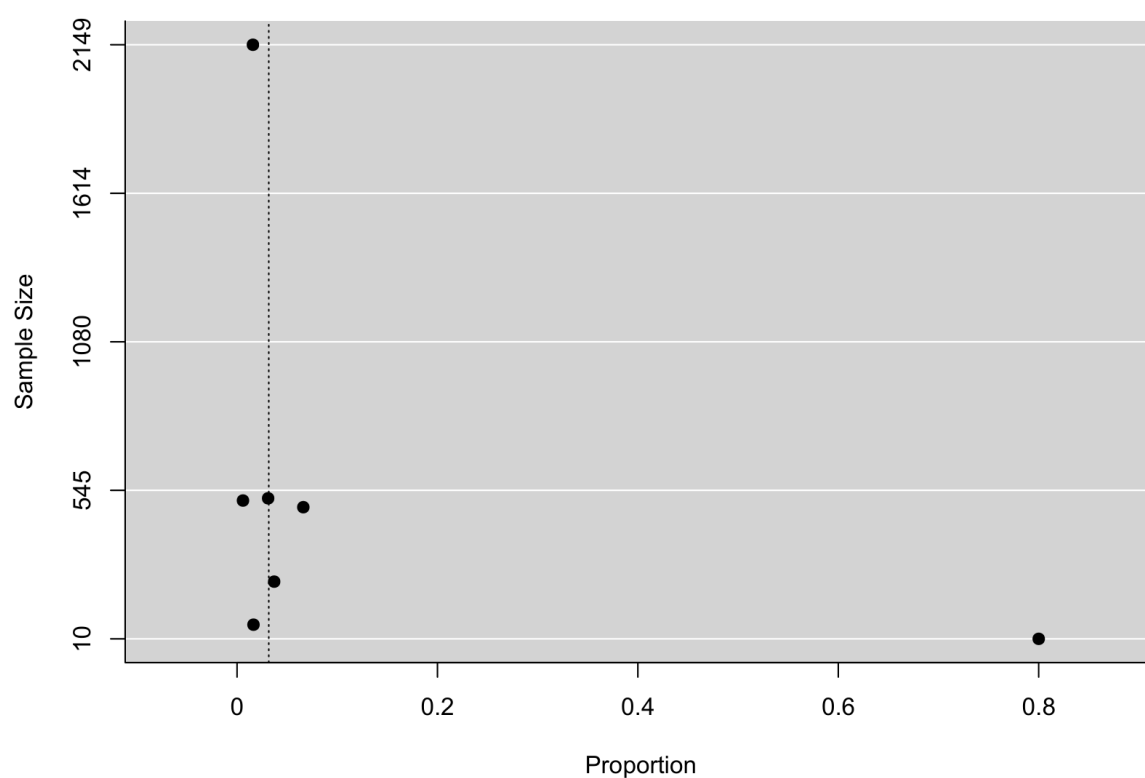

Figure S9. C5\_TF\_LEFT\_SA\_funnel sample size.

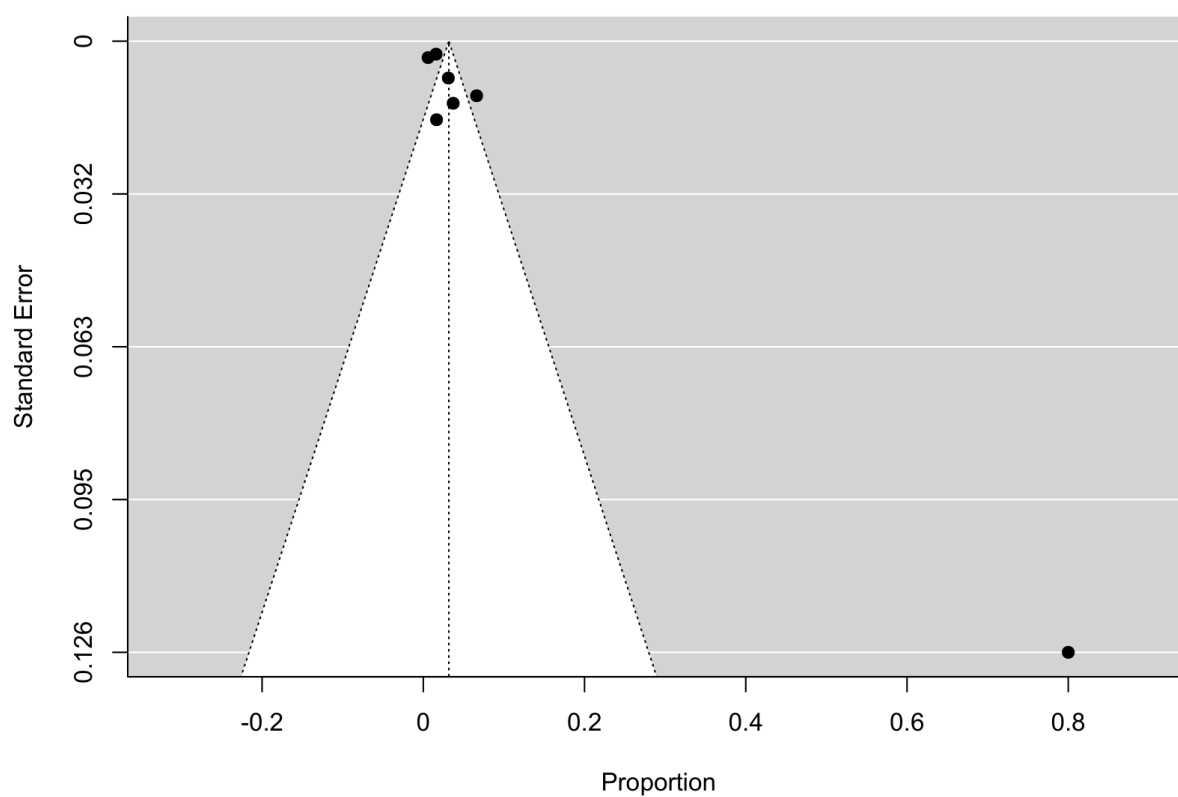

Figure S10. C5\_TF\_LEFT\_SA\_funnel SE.

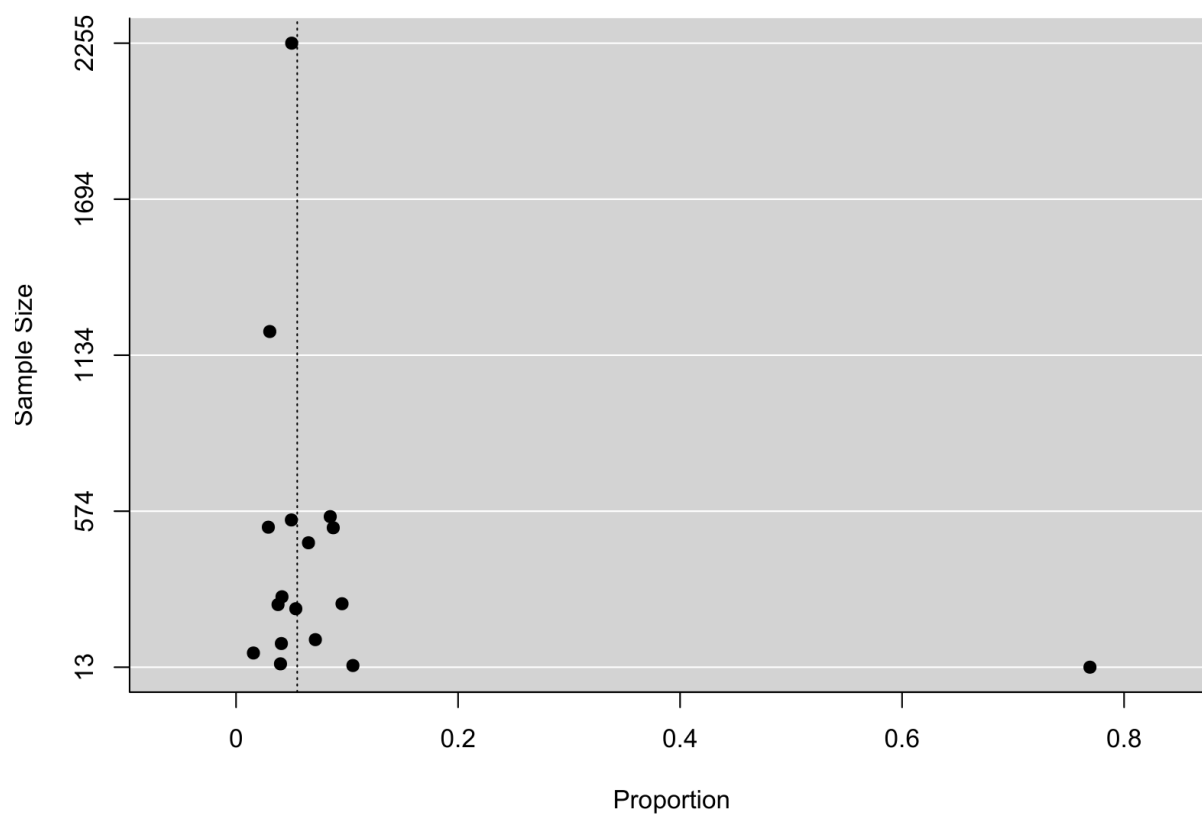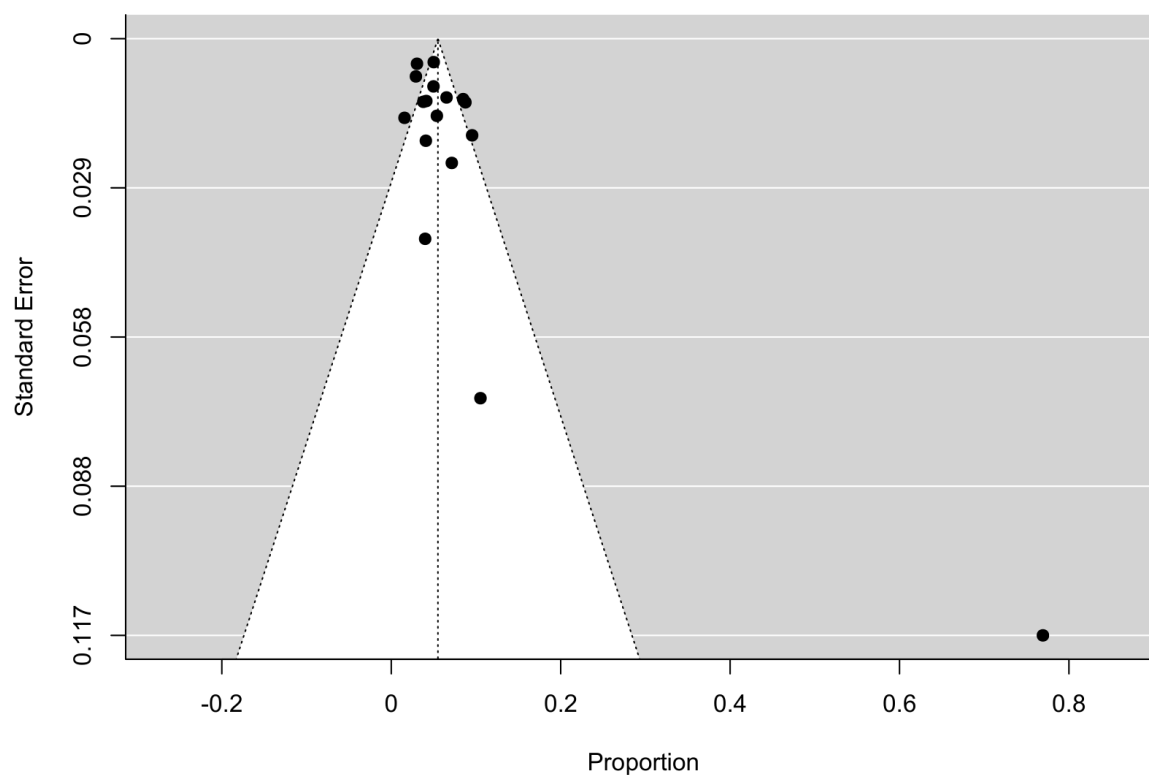

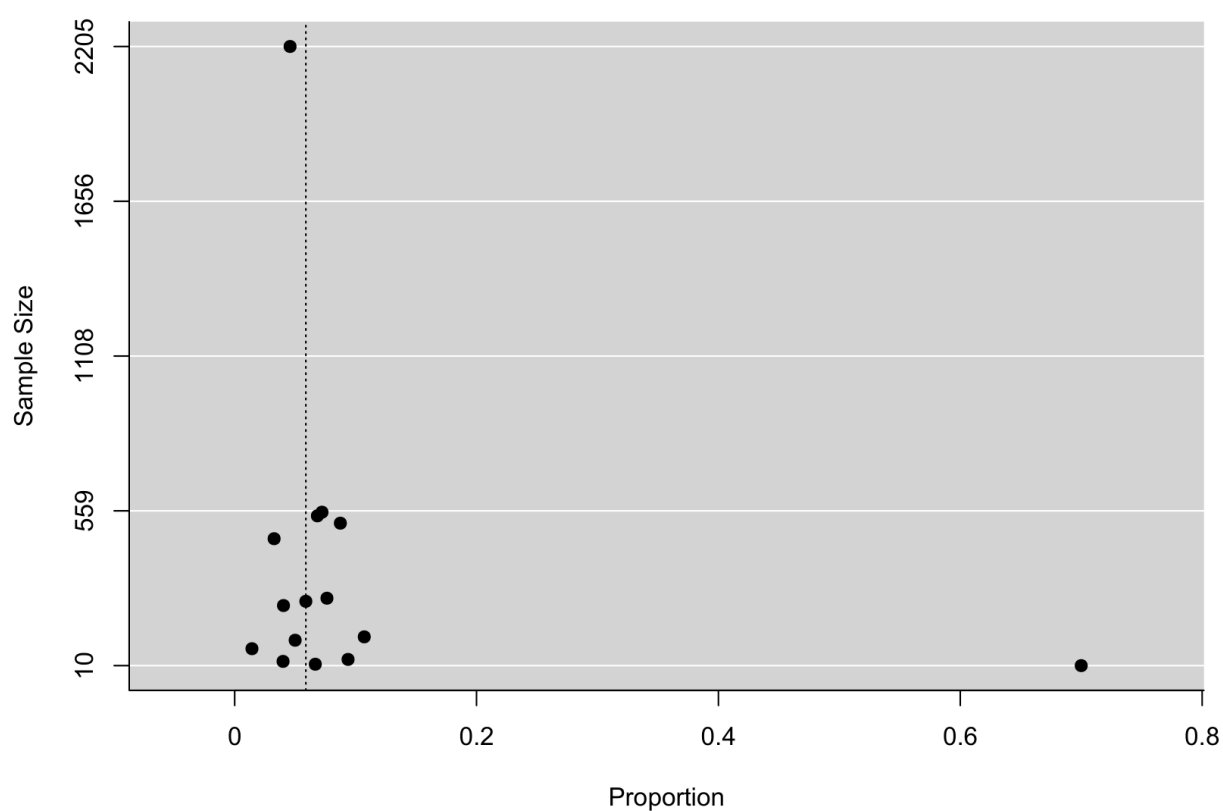

Figure S13. C5\_TF\_RIGHT\_funnel sample size.

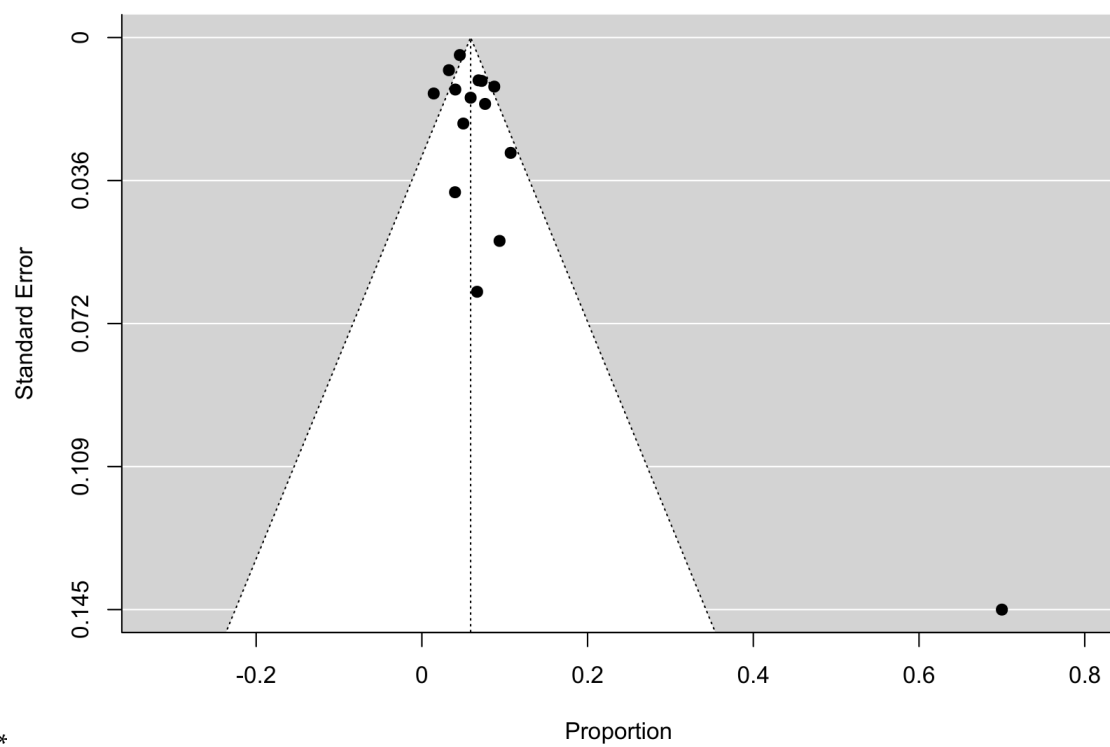

\*

Figure S14. C5\_TF\_RIGHT\_funnel SE.

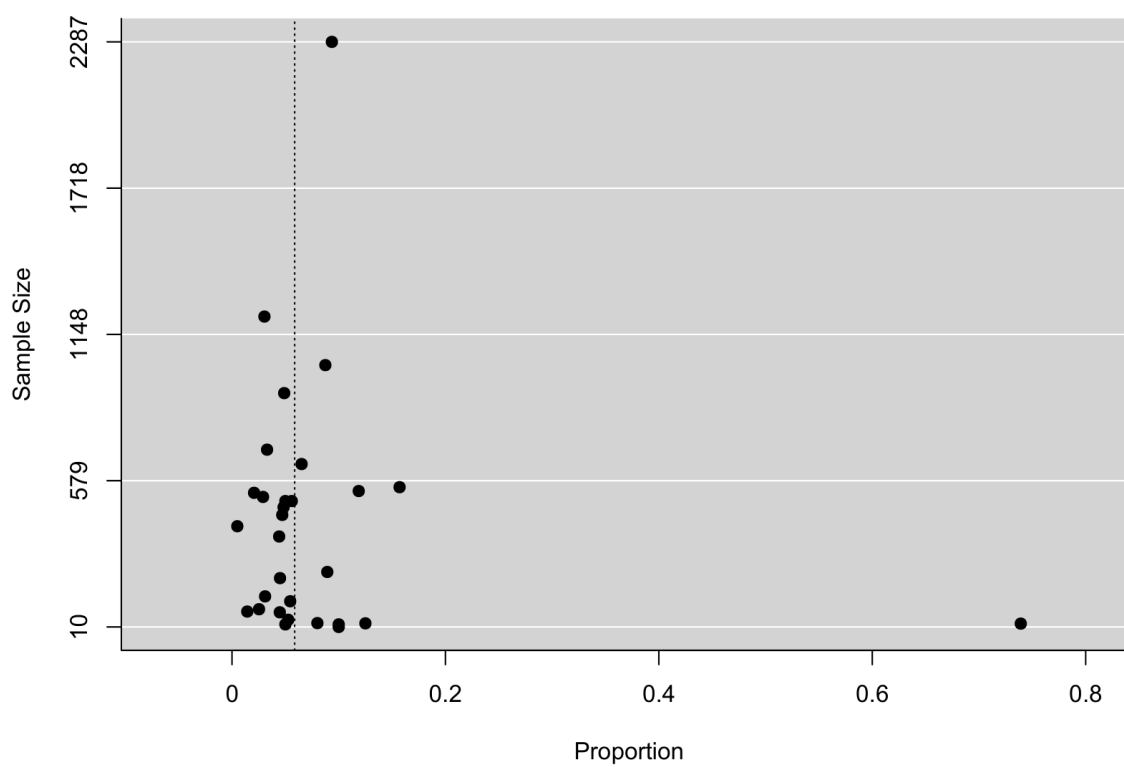

Figure S15. C5\_TF\_funnel sample size.

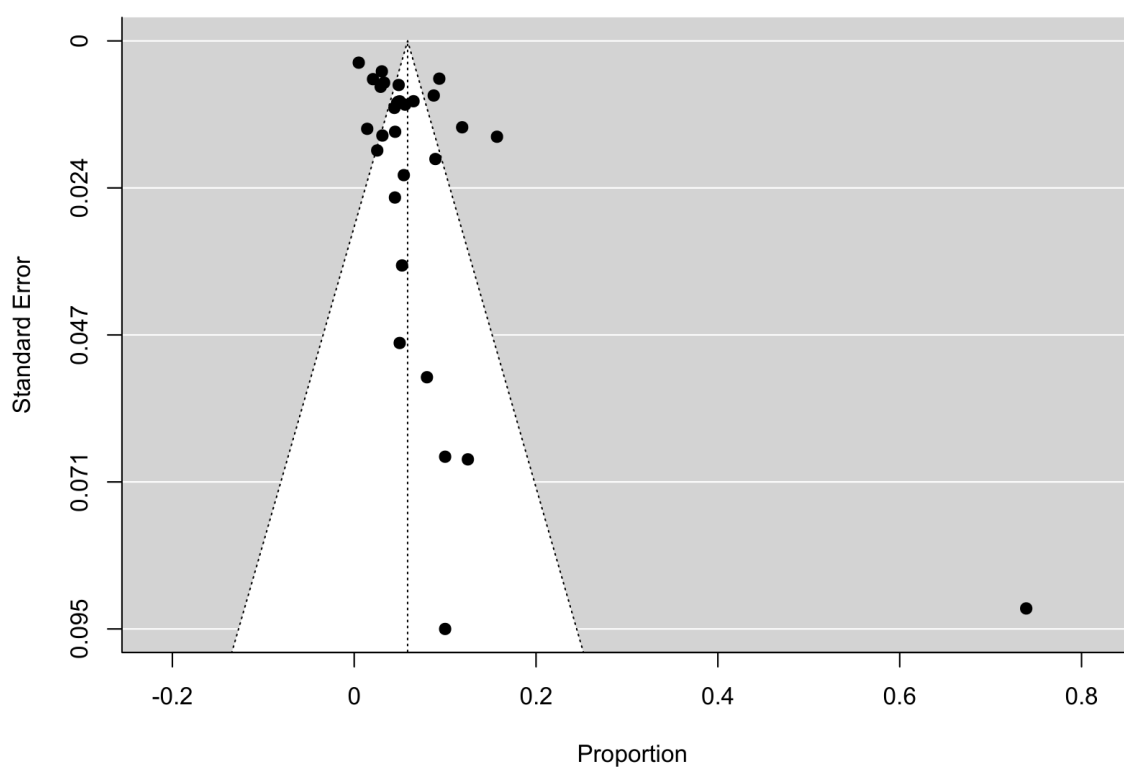

Figure S16. C5\_TF\_funnel SE.
